# Supplementary material for: The Unfolded Protein Response Sensor IRE1 Regulates Activation of In Vitro Differentiated Type 1 Conventional DCs with Viral Stimuli
Source: MDPI journal article supplement (doi:10.3390/ijms241210205), 2023-06-16
Supplement: s1 [file s1]

Supplementary Table S1: Antibodies used in this study

| ANTIBODY          | FLUOROPHORE | CONCENTRATION | CLONE    | BRAND       |
|-------------------|-------------|---------------|----------|-------------|
| CD11b             | FITC        | 1/400         | M1/70    | Biologend   |
| CD11c             | APC         | 1/800         | N418     | eBioscience |
| CD11c             | BV711       | 1/800         | N418     | Biologend   |
| CD11c             | PE          | 1/800         | N418     | Biologend   |
| CD16/32 (FcBlock) | Purified    | 1/400         | 93       | Biologend   |
| CD172a (SIRPα)    | Biotin      | 1/100         | P84      | Biologend   |
| CD172a (SIRPα)    | PE-Cy7      | 1/400         | P84      | Biologend   |
| CD172a (SIRPα)    | PerCP-Cy5.5 | 1/400         | P84      | Biologend   |
| CD274 (PD-L1)     | BV711       | 1/200         | MIH5     | BD          |
| CD274 (PD-L1)     | PE          | 1/200         | MIH5     | Invitrogen  |
| CD40              | APC         | 1/200         | 3/23     | Biologend   |
| CD44              | FITC        | 1/1600        | IM7      | Biologend   |
| CD45R/B220        | Biotin      | 1/100         | RA3-6B2  | Biologend   |
| CD80              | BUV395      | 1/200         | 16-10A1  | BD          |
| CD86              | PE-Cy7      | 1/400         | GL-1     | Biologend   |
| H2Kb              | FITC        | 1/800         | AF6-88.5 | Biologend   |
| IL-12/IL23 p40    | eFluor660   | 1/200         | C17.8    | eBioscience |
| IL-6              | PE          | 1/200         | MP5-20F3 | Biologend   |
| Streptavidin      | PE-Cy7      | 1/100         | -        | Biologend   |
| TNFα              | APC         | 1/200         | MP6-XT22 | Biologend   |
| XCR1              | BV650       | 1/400         | ZET      | Biologend   |
| XCR1              | PE          | 1/400         | ZET      | Biologend   |

Supplementary Table S2: qPCR primers used in this study

| GENE    | SEQUENCE                 | REFERENCE                     |
|---------|--------------------------|-------------------------------|
| Erdj4 F | CCCCAGTGTCAAACGTACCAG    | (Lee et al., 2008)            |
| Erdj4 R | AGCGTTTCCAATTTTCCATAAATT | (Lee et al., 2008)            |
| Bip F   | ATGAGGCTGTAGCCTATGGTG    | Roche Universal Probe Library |
| Bip R   | GGGGACAAACATCAAGCAG      | Roche Universal Probe Library |

|                 |                          |                               |
|-----------------|--------------------------|-------------------------------|
| IRE1exón19-20 F | TGCTGAAACACCCCTTCTTC     | Roche Universal Probe Library |
| IRE1exón19-20 R | GCCTCCTTTTCTATTCGGTCA    | Roche Universal Probe Library |
| Chop F          | CCACCACACCTGAAAGCAG      | Roche Universal Probe Library |
| Chop R          | TCCTGCAGATCCTCATACCAG    | Roche Universal Probe Library |
| Herpud F        | AGCAGCCGGACAACCTAAT      | (Wu et al., 2007)             |
| Herpud R        | CTTGGAAGTCTGCTGGACA      | (Wu et al., 2007)             |
| Bloc1s1 F       | CACCCAGCCAGACTCGAC       | (Osorio et al., 2014)         |
| Bloc1s1 R       | GCAGCGATAGCTTCTCTCCTC    | (Osorio et al., 2014)         |
| I27 F           | GCCAAGCGATCCAAGATCAA     | Roche Universal Probe Library |
| I27 R           | GCTGGGTCCCTGAACACATC     | Roche Universal Probe Library |
| Il-12a F        | GTGAAGACGGCCAGAGAAA      | (Satpathy et al., 2013)       |
| Il-12a R        | GGTCCCGTGTGATGTCTTC      | (Satpathy et al., 2013)       |
| Ifna4 F         | CTGCTACTTGGAATGCAACTC    | (Fink et al., 2017)           |
| Ifna4 R         | CAGTCTTGCCAGCAAGTTGG     | (Fink et al., 2017)           |
| Ifnb1 F         | GCACTGGGTGGAATGAGACTATTG | (Fink et al., 2017)           |
| Ifnb1 R         | TTCTGAGGCATCAACTGACAGGTC | (Fink et al., 2017)           |
| Xbp1exón2 F     | CAGCAAGTGGTGGATTTGG      | (Tavernier et al., 2017)      |
| Xbp1exón2 R     | CGTGAGTTTTCTCCCGTAAAAG   | (Tavernier et al., 2017)      |

## Supplementary Figure Legends

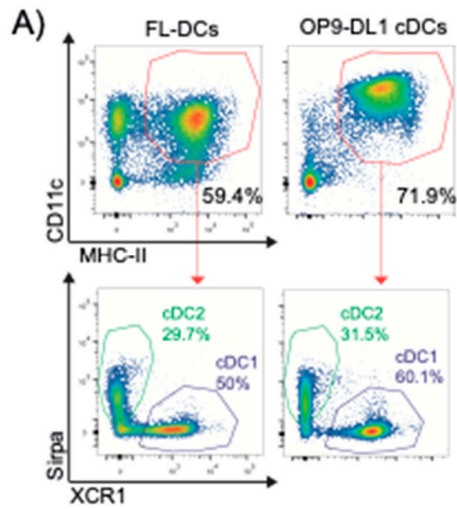

Supplementary Figure S1. Differentiation of cDC1 subpopulation in FL-DCs and OP9-DL1 cDCs cell cultures. A) Comparison between conventional DC cell cultures (FL-DCs) and OP9-DL1 cDCs to evaluate the differentiation into the cDC1 subpopulation. Dot plots depict one representative out of three independent experiments.

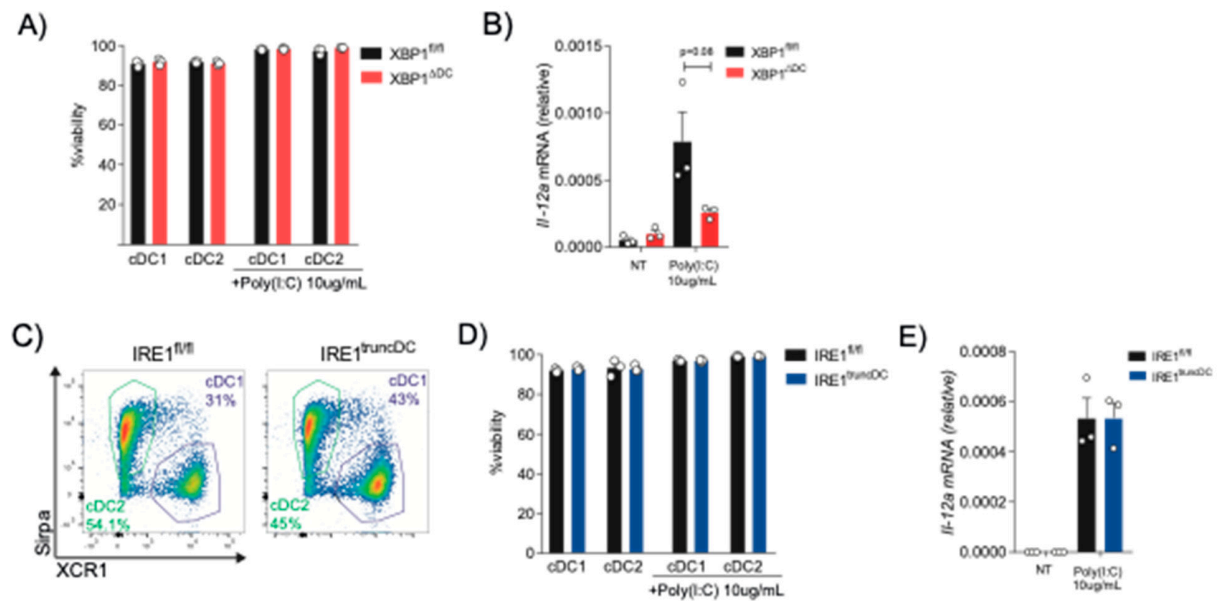

Supplementary Figure S2. Viability of OP9-DL1 cDCs cultures. XBP1<sup>ΔDC</sup>(A) and (D) IRE1<sup>truncDC</sup> OP9-DL1 cDCs were cultivated with viral agonist Poly(I:C) to evaluate cell survival. Il12a expression was measured by qPCR in XBP1<sup>ΔDC</sup>(B) and (E) IRE1<sup>truncDC</sup> OP9-DL1 cDC1s stimulated with Poly(I:C) 10 μg/mL for 4 h. C) OP9-DL1cDCs cultures from IRE1<sup>truncDC</sup> and control mice.
